# Supplementary material for: The Next Frontier of Environmental Unknowns: Substances of Unknown or Variable Composition, Complex Reaction Products, or Biological Materials (UVCBs)
Source: PubMed Central journal article supplement (PMC9228065; doi:10.1021/acs.est.2c00321), 2022-05-09
Supplement: es2c00321_si_002.pdf [file es2c00321_si_002.pdf]

## Supporting Information

# **The Next Frontier of Environmental Unknowns: Substances of Unknown or Variable Composition, Complex Reaction Products or Biological Materials (UVCBs)**

Adelene Lai<sup>1,2\*</sup>, Alex M. Clark<sup>3</sup>, Beate I. Escher<sup>4,5</sup>, Marc Fernandez<sup>6</sup>, Leah R. McEwen<sup>7,8</sup>, Zhenyu Tian<sup>9</sup>, Zhanyun Wang<sup>10,11</sup>, and Emma L. Schymanski<sup>1\*</sup>

ORCID: AL: [0000-0002-2985-6473](https://orcid.org/0000-0002-2985-6473), AMC: [0000-0002-3395-4666](https://orcid.org/0000-0002-3395-4666), BIE: [0000-0002-5304-706X](https://orcid.org/0000-0002-5304-706X), LRM: [0000-0003-2968-1674](https://orcid.org/0000-0003-2968-1674), ZT: [0000-0002-7491-7028](https://orcid.org/0000-0002-7491-7028), ZW: [0000-0001-9914-7659](https://orcid.org/0000-0001-9914-7659), ELS: [0000-0001-6868-8145](https://orcid.org/0000-0001-6868-8145)

<sup>1</sup>Luxembourg Centre for Systems Biomedicine (LCSB), University of Luxembourg, 6 avenue du Swing, 4367 Belvaux, Luxembourg.

<sup>2</sup>Institute for Inorganic and Analytical Chemistry, Friedrich-Schiller University, Lessing Strasse 8, 07743 Jena, Germany.

<sup>3</sup>Collaborative Drug Discovery, Burlingame, CA, USA.

<sup>4</sup>Helmholtz Centre for Environmental Research GmbH – UFZ, Permoserstraße 15, 04318 Leipzig, Germany.

<sup>5</sup>Environmental Toxicology, Center for Applied Geosciences, Eberhard Karls University Tübingen, 72076 Tübingen, Germany.

<sup>6</sup>Environment and Climate Change Canada, Vancouver, British Columbia, Canada.

<sup>7</sup>Cornell University, Ithaca, NY, USA.

<sup>8</sup>International Union of Pure and Applied Chemistry, Research Triangle Park, NC, USA.

<sup>9</sup>Department of Chemistry and Chemical Biology, Department of Marine and Environmental Sciences, Northeastern University, Boston, 02115, MA, USA

<sup>10</sup>Chair of Ecological Systems Design, Institute of Environmental Engineering, ETH Zürich, 8093 Zürich, Switzerland.

<sup>11</sup>Empa – Swiss Federal Laboratories for Materials Science and Technology, Technology and Society Laboratory, Lerchenfeldstrasse 5, 9014 St. Gallen, Switzerland

*\*Corresponding Authors*

Pages: 3

Figures: 0

Tables: 1

**Table S2:** Summary of major inventories/databases containing UVCBs and the relevant information fields within them (as of August 2021).

| Inventory/<br>Database                                           | Format                                                                           | Substance<br>Name Field | CASRN<br>Field | Internal<br>ID Field  | Indicative UVCB<br>flag                                    | Chemical<br>Structure<br>Field | Physico-<br>chemical<br>Properties<br>Field | Programmatic<br>Accessibility | Notes                                                                                                                                                                                                                                                                                                                                                                                                                                                                                                                  |
|------------------------------------------------------------------|----------------------------------------------------------------------------------|-------------------------|----------------|-----------------------|------------------------------------------------------------|--------------------------------|---------------------------------------------|-------------------------------|------------------------------------------------------------------------------------------------------------------------------------------------------------------------------------------------------------------------------------------------------------------------------------------------------------------------------------------------------------------------------------------------------------------------------------------------------------------------------------------------------------------------|
| Non-confidential<br>EPA TSCA<br>Inventory <sup>1</sup>           | Downloadable .csv or<br>Microsoft Access database,<br>version updates over time. | Y                       | Y              | Y – ID                | Y (16,988 of<br>68,167 are<br>UVCBs, as of<br>August 2021) | N                              | N                                           | N                             | TCSA has ‘chemical substance definition’ field (DEF; publicly accessible) containing a short description of the substance <i>e.g.</i> , Castor oil, CAS 8001-79-4: <i>Extractives and their physically modified derivatives. It consists primarily of the glycerides of the fatty acid ricinoleic. (Ricinus communis).</i>                                                                                                                                                                                             |
| EPA CompTox<br>Dashboard <sup>2,3</sup>                          | Online database                                                                  | Y                       | Y              | Y –<br>DTXSID         | N                                                          | Y (see Notes)                  | Y                                           | N                             | CompTox Dashboard contains Synonyms field, Chemical Functional Use, Product & Use Categories, Production Volume, Bioactivity, and multiple links to literature.<br><br>Chemical Structures: ‘Markush Children’ and ‘Constituents’ included as ‘Related Chemicals’                                                                                                                                                                                                                                                      |
| REACH Registered<br>Substances <sup>4</sup>                      | Online database                                                                  | Y                       | Y              | Y – EC No.            | N                                                          | Y (see Notes)                  | Y                                           | N                             | ECHA database has Regulatory Process Names, IUPAC Names, Other Identifiers. Has information on Regulatory Context <i>i.e.</i> , if it appears in any regulatory lists. Has short description of substance: <i>e.g.</i> , CAS RN 8001-79-4, <i>extractives and their physically modified derivatives. It consists primarily of the glycerides of the fatty acid ricinoleic. (Ricinus communis, Euphorbiaceae).</i><br>Chemical Structures: availability varies; can be represented as molecular formula, SMILES, InChI. |
| EC Inventory<br>(includes EINECS +<br>ELINCS + NLP) <sup>5</sup> | Online database or<br>downloadable .csv                                          | Y – EC and<br>ECHA Name | Y              | Y – EC No.            | N                                                          | N                              | Y                                           | N                             | EINECS and ELINCS contain short description of substance, <i>e.g.</i> , CAS RN 8001-79-4, “ <i>Extractives and their physically modified derivatives. It consists primarily of the glycerides of the fatty acid ricinoleic. (Ricinus communis, Euphorbiaceae).</i> ”                                                                                                                                                                                                                                                   |
| CAS Common<br>Chemistry <sup>6</sup>                             | Online database                                                                  | Y                       | Y              | Y- CASRN              | N                                                          | N                              | Y when<br>available                         | N                             | “Other names”, experimental properties, deleted and alternate CAS Registry Numbers                                                                                                                                                                                                                                                                                                                                                                                                                                     |
| SciFinder <sup>7</sup>                                           | Online database<br>(proprietary)                                                 | Y                       | Y              | Y-CASRN               | Y                                                          | Y                              | Y when<br>available                         | N                             | “Other names”, experimental properties (more than Common Chemistry), regulatory information, deleted and alternate CAS Registry Numbers                                                                                                                                                                                                                                                                                                                                                                                |
| PubChem <sup>8,9</sup>                                           | Online database                                                                  | Y                       | Y              | Y-<br>Substance<br>SI | Y (see Notes)                                              | Y                              | Y when<br>available                         | Y                             | PubChem has depositor-supplied synonyms field. Indicative UVCB Flag: available if depositor comments include the term UVCB.                                                                                                                                                                                                                                                                                                                                                                                            |

## References

- (1) United States Environmental Protection Agency. How to Access the TSCA Inventory. <https://www.epa.gov/tsca-inventory/how-access-tsca-inventory> (accessed 2021 -09 -05).
- (2) United States Environmental Protection Agency. CompTox Portal. <https://comptox.epa.gov/> (accessed 2021 -09 -05).
- (3) Williams, A. J.; Grulke, C. M.; Edwards, J.; McEachran, A. D.; Mansouri, K.; Baker, N. C.; Patlewicz, G.; Shah, I.; Wambaugh, J. F.; Judson, R. S.; Richard, A. M. The CompTox Chemistry Dashboard: A Community Data Resource for Environmental Chemistry. *J Cheminform* **2017**, *9* (1), 61. <https://doi.org/10.1186/s13321-017-0247-6>.
- (4) European Chemicals Agency. Advanced Search for Chemicals - ECHA. [https://echa.europa.eu/advanced-search-for-chemicals?p\\_p\\_id=dissadvancedsearch\\_WAR\\_disssearchportlet&p\\_p\\_lifecycle=0](https://echa.europa.eu/advanced-search-for-chemicals?p_p_id=dissadvancedsearch_WAR_disssearchportlet&p_p_lifecycle=0) (accessed 2021 -09 -05).
- (5) European Chemicals Agency. EC Inventory. <https://echa.europa.eu/information-on-chemicals/ec-inventory> (accessed 2021 -09 -05).
- (6) Chemical Abstracts Service. CAS Common Chemistry. <https://commonchemistry.cas.org/> (accessed 2021 -09 -05).
- (7) Chemical Abstracts Service. SciFinder<sup>®</sup>. <https://scifinder.cas.org> (accessed 2021 -09 -05).
- (8) National Institutes of Health. PubChem. <https://pubchem.ncbi.nlm.nih.gov/> (accessed 2020 -08 -13).
- (9) Kim, S.; Chen, J.; Cheng, T.; Gindulyte, A.; He, J.; He, S.; Li, Q.; Shoemaker, B. A.; Thiessen, P. A.; Yu, B.; Zaslavsky, L.; Zhang, J.; Bolton, E. E. PubChem in 2021: New Data Content and Improved Web Interfaces. *Nucleic Acids Research* **2021**, *49* (D1), D1388–D1395. <https://doi.org/10.1093/nar/gkaa971>.
